# Supplementary material
Source: publisher figshare collection journal article supplement (https://future-science-group.figshare.com/ndownloader/files/28762416)
Supplement: Supplementary file 1 [file 28762416]

## **Supplementary material**

**Journal name:** Biomarkers in Medicine

**Article title:** High expression of *DNAJ1* (*HDJ2*) predicts unfavorable survival outcomes in breast cancer

**Author names:** Furkan Celebi ILERİ<sup>1</sup>, Tolga ACUN<sup>1\*</sup>

<sup>1</sup> Department of Molecular Biology and Genetics, Zonguldak Bulent Ecevit University, Zonguldak, Turkey

**\* Corresponding Author:**

Tolga Acun, PhD

Department of Molecular Biology and Genetics

Zonguldak Bulent Ecevit University

Zonguldak 67100, Turkey

ORCID No: 0000-0001-7636-1783

E-mail: [tolgaacun@yahoo.com](mailto:tolgaacun@yahoo.com)

Tel: +90.372.2911778

## Supplemental Table S1

### Sample information sheet of the commercial tissue microarray (TMA) used in the study

**TMA (BC081116b):** Breast carcinoma tissue microarray with adjacent breast tissue, containing 100 cases of breast invasive ductal carcinoma and 10 cases of adjacent breast tissue, single core per case (Biomax Inc. Rockville, MD, USA)

| Pos. ♣ | No. ♣ | Age ♣ | Sex ♣ | Organ/Anatomic Site ♣ | Pathology diagnosis ♣     | TNM ♣   | Grade ♣ | Stage ♣ | Type ♣    | ER ♣ | PR ♣ | HER2 ♣ |
|--------|-------|-------|-------|-----------------------|---------------------------|---------|---------|---------|-----------|------|------|--------|
| A1     | 1     | 60    | F     | Breast                | Invasive ductal carcinoma | T2N0M0  | 1       | IIA     | malignant | +++  | +++  | 0      |
| A2     | 2     | 49    | F     | Breast                | Invasive ductal carcinoma | T3N1M0  | 1       | IIIA    | malignant | -    | -    | 1+     |
| A3     | 3     | 67    | F     | Breast                | Invasive ductal carcinoma | T2N0M0  | 1       | IIA     | malignant | -    | -    | 3+     |
| A4     | 4     | 58    | F     | Breast                | Invasive ductal carcinoma | T2N0M0  | 1       | IIA     | malignant | +++  | -    | 0      |
| A5     | 5     | 38    | F     | Breast                | Invasive ductal carcinoma | T2N0M0  | 1       | IIA     | malignant | -    | -    | 0      |
| A6     | 6     | 52    | F     | Breast                | Invasive ductal carcinoma | T2N0M0  | 1       | IIA     | malignant | -    | -    | 3+     |
| A7     | 7     | 64    | F     | Breast                | Invasive ductal carcinoma | T2N0M0  | 1       | IIA     | malignant | *    | *    | *      |
| A8     | 8     | 59    | F     | Breast                | Invasive ductal carcinoma | T1cN0M0 | 2       | I       | malignant | -    | -    | 0      |
| A9     | 9     | 52    | F     | Breast                | Invasive ductal carcinoma | T1cN0M0 | 2       | I       | malignant | +++  | +    | 0      |
| A10    | 10    | 70    | F     | Breast                | Invasive ductal carcinoma | T2N0M0  | 1       | IIA     | malignant | +    | -    | 0      |
| B1     | 11    | 43    | F     | Breast                | Invasive ductal carcinoma | T2N0M0  | 2       | IIA     | malignant | +++  | +++  | 0      |
| B2     | 12    | 51    | F     | Breast                | Invasive ductal carcinoma | T2N0M0  | 2       | IIA     | malignant | +++  | +    | 0      |
| B3     | 13    | 50    | F     | Breast                | Invasive ductal carcinoma | T3N2M0  | 2       | IIIA    | malignant | +++  | +    | 1+     |
| B4     | 14    | 43    | F     | Breast                | Invasive ductal carcinoma | T1cN0M0 | -       | I       | malignant | +++  | +++  | 0      |
| B5     | 15    | 41    | F     | Breast                | Invasive ductal carcinoma | T2N0M0  | 2       | IIA     | malignant | +++  | ++   | 3+     |
| B6     | 16    | 74    | F     | Breast                | Invasive ductal carcinoma | T2N0M0  | 2       | IIA     | malignant | +++  | ++   | 0      |
| B7     | 17    | 71    | F     | Breast                | Invasive ductal carcinoma | T2N1M0  | 2       | IIB     | malignant | -    | -    | 0      |
| B8     | 18    | 42    | F     | Breast                | Invasive ductal carcinoma | T3N0M0  | 2       | IIB     | malignant | -    | -    | 1+     |
| B9     | 19    | 32    | F     | Breast                | Invasive ductal carcinoma | T4N1M0  | 2       | IIIB    | malignant | ++   | -    | 3+     |
| B10    | 20    | 87    | F     | Breast                | Invasive ductal carcinoma | T2N1M0  | 2       | IIB     | malignant | -    | -    | 1+     |
| C1     | 21    | 50    | F     | Breast                | Invasive ductal carcinoma | T2N0M0  | 1       | IIA     | malignant | +    | +    | 1+     |
| C2     | 22    | 46    | F     | Breast                | Invasive ductal carcinoma | T2N0M0  | -       | IIA     | malignant | -    | -    | 3+     |
| C3     | 23    | 46    | F     | Breast                | Invasive ductal carcinoma | T2N0M0  | 2       | IIA     | malignant | -    | -    | 3+     |
| C4     | 24    | 42    | F     | Breast                | Invasive ductal carcinoma | T2N0M0  | 2       | IIA     | malignant | -    | -    | 0      |
| C5     | 25    | 50    | F     | Breast                | Invasive ductal carcinoma | T2N0M0  | 2       | IIA     | malignant | +++  | +++  | 0      |
| C6     | 26    | 46    | F     | Breast                | Invasive ductal carcinoma | T2N0M0  | 2       | IIA     | malignant | -    | -    | 3+     |
| C7     | 27    | 45    | F     | Breast                | Invasive ductal carcinoma | T4N0M0  | 2       | IIIB    | malignant | +++  | +++  | 0      |
| C8     | 28    | 95    | F     | Breast                | Invasive ductal carcinoma | T1N0M0  | 2       | I       | malignant | +++  | +    | 2+     |
| C9     | 29    | 52    | F     | Breast                | Invasive ductal carcinoma | T2N0M0  | 2       | IIA     | malignant | -    | -    | 2+     |
| C10    | 30    | 53    | F     | Breast                | Invasive ductal carcinoma | T3N0M0  | 2       | IIB     | malignant | -    | -    | 0      |
| D1     | 31    | 50    | F     | Breast                | Invasive ductal carcinoma | T2N0M0  | 2       | IIA     | malignant | +++  | ++   | 0      |
| D2     | 32    | 64    | F     | Breast                | Invasive ductal carcinoma | T2N0M0  | 2       | IIA     | malignant | +++  | -    | 1+     |
| D3     | 33    | 42    | F     | Breast                | Invasive ductal carcinoma | T2N0M0  | 2       | IIA     | malignant | ++   | +++  | 0      |
| D4     | 34    | 45    | F     | Breast                | Invasive ductal carcinoma | T2N1M0  | 2       | IIB     | malignant | +++  | +    | 3+     |
| D5     | 35    | 36    | F     | Breast                | Invasive ductal carcinoma | T2N0M0  | 2       | IIA     | malignant | ++   | +++  | 0      |
| D6     | 36    | 34    | F     | Breast                | Invasive ductal carcinoma | T4N0M0  | 2       | IIIB    | malignant | +++  | -    | 0      |
| D7     | 37    | 58    | F     | Breast                | Invasive ductal carcinoma | T2N0M0  | 2       | IIA     | malignant | ++   | -    | 3+     |
| D8     | 38    | 58    | F     | Breast                | Invasive ductal carcinoma | T2N1M0  | 2       | IIB     | malignant | +++  | +++  | 0      |
| D9     | 39    | 38    | F     | Breast                | Invasive ductal carcinoma | T2N0M0  | 2       | IIA     | malignant | +++  | +    | 3+     |
| D10    | 40    | 55    | F     | Breast                | Invasive ductal carcinoma | T4N0M0  | 2       | IIIB    | malignant | +    | -    | 3+     |
| E1     | 41    | 76    | F     | Breast                | Invasive ductal carcinoma | T4N0M0  | 2       | IIIB    | malignant | +++  | +++  | 0      |
| E2     | 42    | 51    | F     | Breast                | Invasive ductal carcinoma | T2N1M0  | 2       | IIB     | malignant | ++   | +    | 3+     |
| E3     | 43    | 50    | F     | Breast                | Invasive ductal carcinoma | T2N0M0  | 2       | IIA     | malignant | ++   | -    | 0      |
| E4     | 44    | 50    | F     | Breast                | Invasive ductal carcinoma | T4N0M0  | 2       | IIIB    | malignant | +++  | +++  | 0      |
| E5     | 45    | 61    | F     | Breast                | Invasive ductal carcinoma | T2N0M0  | 2       | IIA     | malignant | +++  | -    | 0      |
| E6     | 46    | 41    | F     | Breast                | Invasive ductal carcinoma | T2N0M0  | -       | IIA     | malignant | -    | -    | 0      |
| E7     | 47    | 44    | F     | Breast                | Invasive ductal carcinoma | T3N0M0  | 2       | IIB     | malignant | -    | -    | 3+     |
| E8     | 48    | 47    | F     | Breast                | Invasive ductal carcinoma | T4bN0M0 | 2       | IIIB    | malignant | -    | -    | 3+     |
| E9     | 49    | 38    | F     | Breast                | Invasive ductal carcinoma | T1N1M0  | -       | IIA     | malignant | +++  | +++  | 0      |
| E10    | 50    | 48    | F     | Breast                | Invasive ductal carcinoma | T3N0M0  | 2       | IIB     | malignant | +++  | +++  | 0      |
| F1     | 51    | 37    | F     | Breast                | Invasive ductal carcinoma | T2N0M0  | 2       | IIA     | malignant | +    | -    | 3+     |
| F2     | 52    | 72    | F     | Breast                | Invasive ductal carcinoma | T2N0M0  | 2       | IIA     | malignant | *    | *    | *      |
| F3     | 53    | 45    | F     | Breast                | Invasive ductal carcinoma | T2N0M0  | 2       | IIA     | malignant | -    | -    | 0      |
| F4     | 54    | 48    | F     | Breast                | Invasive ductal carcinoma | T2N0M0  | 2       | IIA     | malignant | -    | -    | 0      |
| F5     | 55    | 38    | F     | Breast                | Invasive ductal carcinoma | T2N1M0  | 2       | IIB     | malignant | -    | -    | 0      |
| F6     | 56    | 45    | F     | Breast                | Invasive ductal carcinoma | T2N0M0  | 2       | IIA     | malignant | -    | -    | 0      |
| F7     | 57    | 40    | F     | Breast                | Invasive ductal carcinoma | T1N0M0  | 2       | I       | malignant | -    | -    | 0      |
| F8     | 58    | 47    | F     | Breast                | Invasive ductal carcinoma | T2N0M0  | 2       | IIA     | malignant | +    | +    | *      |
| F9     | 59    | 71    | F     | Breast                | Invasive ductal carcinoma | T4N2M0  | 2       | IIIB    | malignant | +++  | +++  | 0      |
| F10    | 60    | 47    | F     | Breast                | Invasive ductal carcinoma | T2N1M0  | -       | IIB     | malignant | +    | -    | 3+     |

|     |    |    |   |        |                           |         |   |      |           |     |     |    |
|-----|----|----|---|--------|---------------------------|---------|---|------|-----------|-----|-----|----|
| G1  | 61 | 66 | F | Breast | Invasive ductal carcinoma | T2N0M0  | 2 | IIA  | malignant | +++ | +++ | 0  |
| G2  | 62 | 35 | F | Breast | Invasive ductal carcinoma | T1N0M0  | 2 | I    | malignant | ++  | ++  | 3+ |
| G3  | 63 | 47 | F | Breast | Invasive ductal carcinoma | T4bN0M0 | 2 | IIIB | malignant | ++  | +++ | 3+ |
| G4  | 64 | 44 | F | Breast | Invasive ductal carcinoma | T2N0M0  | 2 | IIA  | malignant | ++  | ++  | 0  |
| G5  | 65 | 38 | F | Breast | Invasive ductal carcinoma | T2N0M0  | 1 | IIA  | malignant | -   | -   | 3+ |
| G6  | 66 | 55 | F | Breast | Invasive ductal carcinoma | T2N0M0  | - | IIA  | malignant | *   | *   | 3+ |
| G7  | 67 | 46 | F | Breast | Invasive ductal carcinoma | T2N0M0  | 2 | IIA  | malignant | +++ | +   | 0  |
| G8  | 68 | 56 | F | Breast | Invasive ductal carcinoma | T2N0M0  | 2 | IIA  | malignant | ++  | +   | 3+ |
| G9  | 69 | 47 | F | Breast | Invasive ductal carcinoma | T2N0M0  | 2 | IIA  | malignant | -   | -   | 3+ |
| G10 | 70 | 48 | F | Breast | Invasive ductal carcinoma | T2N0M0  | 2 | IIA  | malignant | -   | -   | 0  |
| H1  | 71 | 66 | F | Breast | Invasive ductal carcinoma | T2N0M0  | 2 | IIA  | malignant | +++ | -   | 3+ |
| H2  | 72 | 46 | F | Breast | Invasive ductal carcinoma | T2N0M0  | 2 | IIA  | malignant | +++ | ++  | 0  |
| H3  | 73 | 59 | F | Breast | Invasive ductal carcinoma | T4bN0M0 | 2 | IIIB | malignant | +++ | +   | 0  |
| H4  | 74 | 38 | F | Breast | Invasive ductal carcinoma | T2N0M0  | 2 | IIA  | malignant | +++ | +++ | 0  |
| H5  | 75 | 62 | F | Breast | Invasive ductal carcinoma | T2N0M0  | 2 | IIA  | malignant | +++ | +++ | 0  |
| H6  | 76 | 52 | F | Breast | Invasive ductal carcinoma | T2N0M0  | 2 | IIA  | malignant | -   | -   | 0  |
| H7  | 77 | 54 | F | Breast | Invasive ductal carcinoma | T1N0M0  | 2 | I    | malignant | +++ | ++  | 3+ |
| H8  | 78 | 52 | F | Breast | Invasive ductal carcinoma | T2N0M0  | 2 | IIA  | malignant | ++  | ++  | 3+ |
| H9  | 79 | 49 | F | Breast | Invasive ductal carcinoma | T2N0M0  | 2 | IIA  | malignant | +++ | +++ | 3+ |
| H10 | 80 | 43 | F | Breast | Invasive ductal carcinoma | T2N0M0  | 2 | IIA  | malignant | +++ | +++ | 0  |
| I1  | 81 | 33 | F | Breast | Invasive ductal carcinoma | T2N0M0  | 2 | IIA  | malignant | +++ | +++ | 0  |
| I2  | 82 | 47 | F | Breast | Invasive ductal carcinoma | T2N0M0  | 2 | IIA  | malignant | +   | +++ | 1+ |
| I3  | 83 | 32 | F | Breast | Invasive ductal carcinoma | T2N0M0  | - | IIA  | malignant | *   | *   | *  |
| I4  | 84 | 38 | F | Breast | Invasive ductal carcinoma | T2N0M0  | 2 | IIA  | malignant | +   | +++ | 0  |
| I5  | 85 | 70 | F | Breast | Invasive ductal carcinoma | T2N0M0  | 2 | IIA  | malignant | +++ | +++ | 0  |
| I6  | 86 | 48 | F | Breast | Invasive ductal carcinoma | T2N0M0  | 2 | IIA  | malignant | +++ | ++  | 3+ |
| I7  | 87 | 48 | F | Breast | Invasive ductal carcinoma | T3N1M0  | 2 | IIIA | malignant | +++ | -   | 1+ |
| I8  | 88 | 44 | F | Breast | Invasive ductal carcinoma | T4aN0M0 | 2 | IIIB | malignant | -   | -   | 2+ |
| I9  | 89 | 69 | F | Breast | Invasive ductal carcinoma | T3N0M0  | 2 | IIB  | malignant | +++ | -   | 0  |
| I10 | 90 | 49 | F | Breast | Invasive ductal carcinoma | T2N0M0  | 2 | IIA  | malignant | +   | -   | 0  |

  

|     |     |    |   |               |                                      |         |   |      |           |     |     |    |
|-----|-----|----|---|---------------|--------------------------------------|---------|---|------|-----------|-----|-----|----|
| J1  | 91  | 48 | F | Breast        | Invasive ductal carcinoma            | T2N0M0  | 2 | IIA  | malignant | +++ | +   | 0  |
| J2  | 92  | 42 | F | Breast        | Invasive ductal carcinoma            | T2N1M0  | 2 | IIB  | malignant | ++  | -   | 0  |
| J3  | 93  | 42 | F | Breast        | Invasive ductal carcinoma            | T2N2M0  | 2 | IIIA | malignant | +++ | +++ | 0  |
| J4  | 94  | 49 | F | Breast        | Invasive ductal carcinoma            | T2N0M0  | 2 | IIA  | malignant | -   | -   | 0  |
| J5  | 95  | 68 | F | Breast        | Invasive ductal carcinoma            | T4bN0M0 | 2 | IIIB | malignant | -   | -   | 3+ |
| J6  | 96  | 53 | F | Breast        | Invasive ductal carcinoma            | T2N0M0  | 2 | IIA  | malignant | +++ | +++ | 0  |
| J7  | 97  | 49 | F | Breast        | Invasive ductal carcinoma            | T2N0M0  | 3 | IIA  | malignant | -   | -   | 3+ |
| J8  | 98  | 69 | F | Breast        | Invasive ductal carcinoma            | T2N0M0  | 3 | IIA  | malignant | +   | -   | 3+ |
| J9  | 99  | 36 | F | Breast        | Invasive ductal carcinoma            | T2N0M0  | 2 | IIA  | malignant | -   | -   | 0  |
| J10 | 100 | 29 | F | Breast        | Invasive ductal carcinoma            | T2N0M0  | 2 | IIA  | malignant | -   | -   | 3+ |
| K1  | 101 | 51 | F | Breast        | Cancer adjacent normal breast tissue | -       | - | -    | NAT       | ++  | ++  | 0  |
| K2  | 102 | 37 | F | Breast        | Cancer adjacent normal breast tissue | -       | - | -    | NAT       | ++  | ++  | 0  |
| K3  | 103 | 35 | F | Breast        | Cancer adjacent normal breast tissue | -       | - | -    | NAT       | ++  | +   | 0  |
| K4  | 104 | 45 | F | Breast        | Cancer adjacent normal breast tissue | -       | - | -    | NAT       | -   | -   | 0  |
| K5  | 105 | 35 | F | Breast        | Cancer adjacent normal breast tissue | -       | - | -    | NAT       | +   | ++  | 0  |
| K6  | 106 | 46 | F | Breast        | Cancer adjacent normal breast tissue | -       | - | -    | NAT       | +   | +   | 0  |
| K7  | 107 | 49 | F | Breast        | Cancer adjacent normal breast tissue | -       | - | -    | NAT       | +   | +   | 0  |
| K8  | 108 | 44 | F | Breast        | Cancer adjacent normal breast tissue | -       | - | -    | NAT       | +   | +   | 0  |
| K9  | 109 | 38 | F | Breast        | Cancer adjacent normal breast tissue | -       | - | -    | NAT       | +   | +   | 0  |
| K10 | 110 | 37 | F | Breast        | Cancer adjacent normal breast tissue | -       | - | -    | NAT       | ++  | +   | 0  |
| -   | 0   | 42 | M | Adrenal gland | Pheochromocytoma (tissue marker)     | -       | - | -    | Malignant |     |     |    |

- One sample (Position: D6) is overlap with the cases of TMA (BR486; Positions: A8, B8, C8)

## Supplemental Table S2

### Sample information sheet of the commercial tissue microarray (TMA) used in the study

**TMA (BR486):** Breast invasive ductal carcinoma tissue microarray with matched adjacent normal breast tissue, containing 16 cases of breast invasive ductal carcinoma with matched adjacent normal breast tissue, triplicate cores per case (Biomax Inc. Rockville, MD, USA)

| Pos. | No. | Age | Sex | Organ/Anatomic Site | Pathology diagnosis                                                       | TNM    | Grade | Stage | Type      |
|------|-----|-----|-----|---------------------|---------------------------------------------------------------------------|--------|-------|-------|-----------|
| A1   | 1   | 60  | F   | Breast              | Invasive ductal carcinoma                                                 | T2N0M0 | 2     | Ila   | malignant |
| A2   | 2   | 53  | F   | Breast              | Invasive ductal carcinoma                                                 | T2N0M0 | 2     | Ila   | malignant |
| A3   | 3   | 46  | F   | Breast              | Invasive ductal carcinoma                                                 | T1N0M0 | 1     | I     | malignant |
| A4   | 4   | 51  | F   | Breast              | Invasive ductal carcinoma                                                 | T2N1M0 | 1     | Ilb   | malignant |
| A5   | 5   | 39  | F   | Breast              | Invasive ductal carcinoma                                                 | T2N1M0 | 2     | Ilb   | malignant |
| A6   | 6   | 50  | F   | Breast              | Invasive ductal carcinoma                                                 | T2N1M0 | 1     | Ilb   | malignant |
| A7   | 7   | 48  | F   | Breast              | Invasive ductal carcinoma                                                 | T2N0M0 | 1     | Ila   | malignant |
| A8   | 8   | 34  | F   | Breast              | Invasive ductal carcinoma                                                 | T4N0M0 | 2     | IIIb  | malignant |
| B1   | 9   | 60  | F   | Breast              | Invasive ductal carcinoma                                                 | T2N0M0 | 2     | Ila   | malignant |
| B2   | 10  | 53  | F   | Breast              | Invasive ductal carcinoma                                                 | T2N0M0 | 2     | Ila   | malignant |
| B3   | 11  | 46  | F   | Breast              | Invasive ductal carcinoma                                                 | T1N0M0 | 1     | I     | malignant |
| B4   | 12  | 51  | F   | Breast              | Invasive ductal carcinoma                                                 | T2N1M0 | 1     | Ilb   | malignant |
| B5   | 13  | 39  | F   | Breast              | Invasive ductal carcinoma                                                 | T2N1M0 | 2     | Ilb   | malignant |
| B6   | 14  | 50  | F   | Breast              | Invasive ductal carcinoma                                                 | T2N1M0 | 1     | Ilb   | malignant |
| B7   | 15  | 48  | F   | Breast              | Invasive ductal carcinoma                                                 | T2N0M0 | 1     | Ila   | malignant |
| B8   | 16  | 34  | F   | Breast              | Invasive ductal carcinoma                                                 | T4N0M0 | 2     | IIIb  | malignant |
| C1   | 17  | 60  | F   | Breast              | Cancer adjacent normal breast tissue                                      | -      | -     | -     | NAT       |
| C2   | 18  | 53  | F   | Breast              | Cancer adjacent normal breast tissue (breast                              | -      | -     | -     | NAT       |
| C3   | 19  | 46  | F   | Breast              | Cancer adjacent normal breast tissue                                      | -      | -     | -     | NAT       |
| C4   | 20  | 51  | F   | Breast              | Cancer adjacent normal breast tissue                                      | -      | -     | -     | NAT       |
| C5   | 21  | 39  | F   | Breast              | Cancer adjacent normal breast tissue (adeno sis)                          | -      | -     | -     | NAT       |
| C6   | 22  | 50  | F   | Breast              | Cancer adjacent normal breast tissue (adeno sis)                          | -      | -     | -     | NAT       |
| C7   | 23  | 48  | F   | Breast              | Cancer adjacent normal breast tissue (fibrofatty tissue and blood vessel) | -      | -     | -     | NAT       |
| C8   | 24  | 34  | F   | Breast              | Cancer adjacent normal breast tissue (adeno sis)                          | -      | -     | -     | NAT       |
| D1   | 25  | 31  | F   | Breast              | Invasive ductal carcinoma                                                 | T2N0M0 | 2     | Ila   | malignant |
| D2   | 26  | 53  | F   | Breast              | Invasive ductal carcinoma                                                 | T4N0M0 | 2     | IIIb  | malignant |
| D3   | 27  | 52  | F   | Breast              | Invasive ductal carcinoma                                                 | T2N1M0 | 1     | Ilb   | malignant |
| D4   | 28  | 50  | F   | Breast              | Invasive ductal carcinoma                                                 | T2N1M0 | 1     | Ilb   | malignant |
| D5   | 29  | 46  | F   | Breast              | Invasive ductal carcinoma                                                 | T4N0M0 | 2     | IIIb  | malignant |
| D6   | 30  | 37  | F   | Breast              | Invasive ductal carcinoma                                                 | T4N2M0 | 2     | IIIb  | malignant |
| D7   | 31  | 46  | F   | Breast              | Invasive ductal carcinoma                                                 | T2N0M0 | 3     | Ila   | malignant |
| D8   | 32  | 50  | F   | Breast              | Invasive ductal carcinoma                                                 | T2N2M0 | 3     | IIIa  | malignant |
| E1   | 33  | 31  | F   | Breast              | Invasive ductal carcinoma                                                 | T2N0M0 | 2     | Ila   | malignant |
| E2   | 34  | 53  | F   | Breast              | Invasive ductal carcinoma                                                 | T4N0M0 | 2     | IIIb  | malignant |
| E3   | 35  | 52  | F   | Breast              | Invasive ductal carcinoma                                                 | T2N1M0 | 1     | Ilb   | malignant |
| E4   | 36  | 50  | F   | Breast              | Invasive ductal carcinoma                                                 | T2N1M0 | 1     | Ilb   | malignant |
| E5   | 37  | 46  | F   | Breast              | Invasive ductal carcinoma                                                 | T4N0M0 | 2     | IIIb  | malignant |
| E6   | 38  | 37  | F   | Breast              | Invasive ductal carcinoma                                                 | T4N2M0 | 2     | IIIb  | malignant |
| E7   | 39  | 46  | F   | Breast              | Invasive ductal carcinoma                                                 | T2N0M0 | 3     | Ila   | malignant |
| E8   | 40  | 50  | F   | Breast              | Invasive ductal carcinoma                                                 | T2N2M0 | 3     | IIIa  | malignant |
| F1   | 41  | 31  | F   | Breast              | Cancer adjacent normal breast tissue                                      | -      | -     | -     | NAT       |
| F2   | 42  | 53  | F   | Breast              | Cancer adjacent normal breast tissue                                      | -      | -     | -     | NAT       |
| F3   | 43  | 52  | F   | Breast              | Cancer adjacent normal breast tissue                                      | -      | -     | -     | NAT       |
| F4   | 44  | 50  | F   | Breast              | Cancer adjacent normal breast tissue                                      | -      | -     | -     | NAT       |
| F5   | 45  | 46  | F   | Breast              | Cancer adjacent normal breast tissue                                      | -      | -     | -     | NAT       |
| F6   | 46  | 37  | F   | Breast              | Cancer adjacent normal breast tissue                                      | -      | -     | -     | NAT       |
| F7   | 47  | 46  | F   | Breast              | Cancer adjacent normal breast tissue (spars e)                            | -      | -     | -     | NAT       |
| F8   | 48  | 50  | F   | Breast              | Cancer adjacent normal breast tissue (spars e)                            | -      | -     | -     | NAT       |
| -    | 0   | 55  | F   | liver               | Hepatocellular liver cancer (tissue marker)                               | T3N0M0 | 3     |       | Malignant |

- One sample (Positions: A8, B8, C8) is overlap with the case of TMA (BC081116b; Position: D6)

## Supplemental Table S3

### Primers used for mutation analysis

| Primers used for mutation analysis |                          |                   |
|------------------------------------|--------------------------|-------------------|
| Primer                             | Sequence (5'-3')         | Product Size (bp) |
| F                                  | gctccagaagattccacgag     | 434               |
| R                                  | aggaactgacagcggtccta     |                   |
| Primers used for COBRA             |                          |                   |
| Bi-F                               | gttgagtggagaaaagggttttag | 373               |
| Bi-R                               | ccaaccaaaaaactaaaaacaac  |                   |
| Bi-F                               | gttgagtggagaaaagggttttag | 494               |
| Bi-Nested-R                        | ccaaaacaccacaccaacc      |                   |
| Primers used for Q-RT-PCR          |                          |                   |
| TBP-F*                             | TGCACAGGAGCCAAGAGTGAA    | 132               |
| TBP-R*                             | CACATCACAGCTCCCCACCA     |                   |
| F                                  | CATGCCAATTTATCGTAGACCA   | 147               |
| R                                  | TCAGTCTCTTCCACTTCCTTCC   |                   |

***DNAJ1* Ensembl Gene ID:** ENSG00000086061

(\*) Primer sequences were obtained from Gur-Dedeoglu B. *et al.* (2009).

**Abbreviations:** F, forward primer; R, reverse primer.

## Supplemental Table S4

GEO and Array Express datasets used for survival (OS, RFS and DMFS) analyses by KM-plotter

| Dataset          | Patients used for OS analysis (n) |
|------------------|-----------------------------------|
| GSE1456 (n=159)  | 159                               |
| GSE16446 (n=120) | 107                               |
| GSE16716 (n=47)  | 7                                 |
| GSE20271 (n=96)  | 2                                 |
| GSE20685 (n=327) | 327                               |
| GSE20711 (n=90)  | 88                                |
| GSE3494 (n=251)  | 236                               |
| GSE37946 (n=41)  | 40                                |
| GSE42568 (n=121) | 104                               |
| GSE45255 (n=139) | 134                               |
| GSE7390 (n=198)  | 198                               |
| <b>Total</b>     | <b>1402</b>                       |

| Dataset          | Patients used for DMFS analysis (n) |
|------------------|-------------------------------------|
| GSE11121 (n=200) | 200                                 |
| GSE16446 (n=120) | 107                                 |
| GSE16716 (n=47)  | 1                                   |
| GSE17907 (n=54)  | 38                                  |
| GSE19615 (n=115) | 115                                 |
| GSE20685 (n=327) | 327                                 |
| GSE26971 (n=276) | 256                                 |
| GSE2990 (n=102)  | 95                                  |
| GSE3494 (n=251)  | 130                                 |
| GSE45255 (n=139) | 136                                 |
| GSE5327 (n=58)   | 57                                  |
| GSE6532 (n=82)   | 66                                  |
| GSE7390 (n=198)  | 198                                 |
| GSE9195 (n=77)   | 77                                  |
| <b>Total</b>     | <b>1803</b>                         |

| Dataset            | Patients used for RFS analysis (n) |
|--------------------|------------------------------------|
| E-MTAB-365 (n=537) | 426                                |
| GSE11121 (n=200)   | 200                                |
| GSE12093 (n=136)   | 135                                |
| GSE12276 (n=204)   | 204                                |
| GSE1456 (n=159)    | 159                                |
| GSE16391 (n=55)    | 48                                 |
| GSE16446 (n=120)   | 107                                |
| GSE16716 (n=47)    | 8                                  |
| GSE17705 (n=196)   | 196                                |
| GSE17907 (n=54)    | 38                                 |
| GSE19615 (n=115)   | 115                                |
| GSE20271 (n=96)    | 2                                  |
| GSE2034 (n=286)    | 286                                |
| GSE20685 (n=327)   | 327                                |
| GSE20711 (n=90)    | 88                                 |
| GSE21653 (n=240)   | 230                                |
| GSE2603 (n=99)     | 82                                 |
| GSE26971 (n=276)   | 97                                 |
| GSE2990 (n=102)    | 102                                |
| GSE31519 (n=67)    | 63                                 |
| GSE3494 (n=251)    | 247                                |
| GSE37946 (n=41)    | 40                                 |
| GSE42568 (n=121)   | 104                                |
| GSE45255 (n=139)   | 94                                 |
| GSE4611 (n=153)    | 151                                |
| GSE5327 (n=58)     | 57                                 |
| GSE6532 (n=82)     | 69                                 |
| GSE7390 (n=198)    | 198                                |
| GSE9195 (n=77)     | 77                                 |
| <b>Total</b>       | <b>3951</b>                        |

# Supplemental Table S5

Associations between DNAJA1 protein expression and clinical characteristics of invasive breast carcinoma samples. Immunostaining intensity was graded relatively as: *negative* (score: 0), *weakly positive* (score: 1), *moderately positive* (score: 2), or *strongly positive* (score: 3) stainings. Staining scores of the samples were grouped as “0” vs. “1+2+3”.

|                         |          | IHC Score (0)<br>n (%) |            | IHC Score (1+2+3)<br>n (%) |
|-------------------------|----------|------------------------|------------|----------------------------|
| <b>Tumor stage</b>      |          |                        |            |                            |
|                         | TI       | 2 (22.22)              |            | 7 (77.78)                  |
|                         | TII-TIV  | 7 (6.60)               |            | 99 (93.40)                 |
|                         |          |                        | $P=0.147$  |                            |
|                         | TI-TII   | 5 (5.43)               |            | 87 (94.57)                 |
|                         | TIII-TIV | 4 (17.39)              |            | 19 (82.61)                 |
|                         |          |                        | $P=0.0773$ |                            |
| <b>Lymph node stage</b> |          |                        |            |                            |
|                         | N0       | 7 (7.53)               |            | 86 (92.47)                 |
|                         | NI-NII   | 2 (9.09)               |            | 20 (90.91)                 |
|                         |          |                        | $P=0.6814$ |                            |
| <b>Grade</b>            |          |                        |            |                            |
|                         | GI       | 0 (0)                  |            | 16 (100)                   |
|                         | GII-GIII | 8 (8.70)               |            | 84 (91.30)                 |
|                         |          |                        | $P=0.6018$ |                            |
| <b>Stage</b>            |          |                        |            |                            |
|                         | SI       | 2 (25)                 |            | 6 (75)                     |
|                         | SII-SIII | 7 (6.54)               |            | 100 (93.46)                |
|                         |          |                        | $P=0.1193$ |                            |
| <b>HER2</b>             |          |                        |            |                            |
|                         | Negative | 4 (7.40)               |            | 50 (92.60)                 |
|                         | Positive | 4 (9.52)               |            | 38 (90.48)                 |
|                         |          |                        | $P=0.7262$ |                            |
| <b>PR</b>               |          |                        |            |                            |
|                         | Negative | 5 (10.20)              |            | 44 (89.80)                 |
|                         | Positive | 2 (4.26)               |            | 45 (95.74)                 |
|                         |          |                        | $P=0.4361$ |                            |
| <b>ER</b>               |          |                        |            |                            |
|                         | Negative | 3 (9.37)               |            | 29 (90.63)                 |
|                         | Positive | 4 (6.25)               |            | 60 (93.75)                 |
|                         |          |                        | $P=0.6827$ |                            |



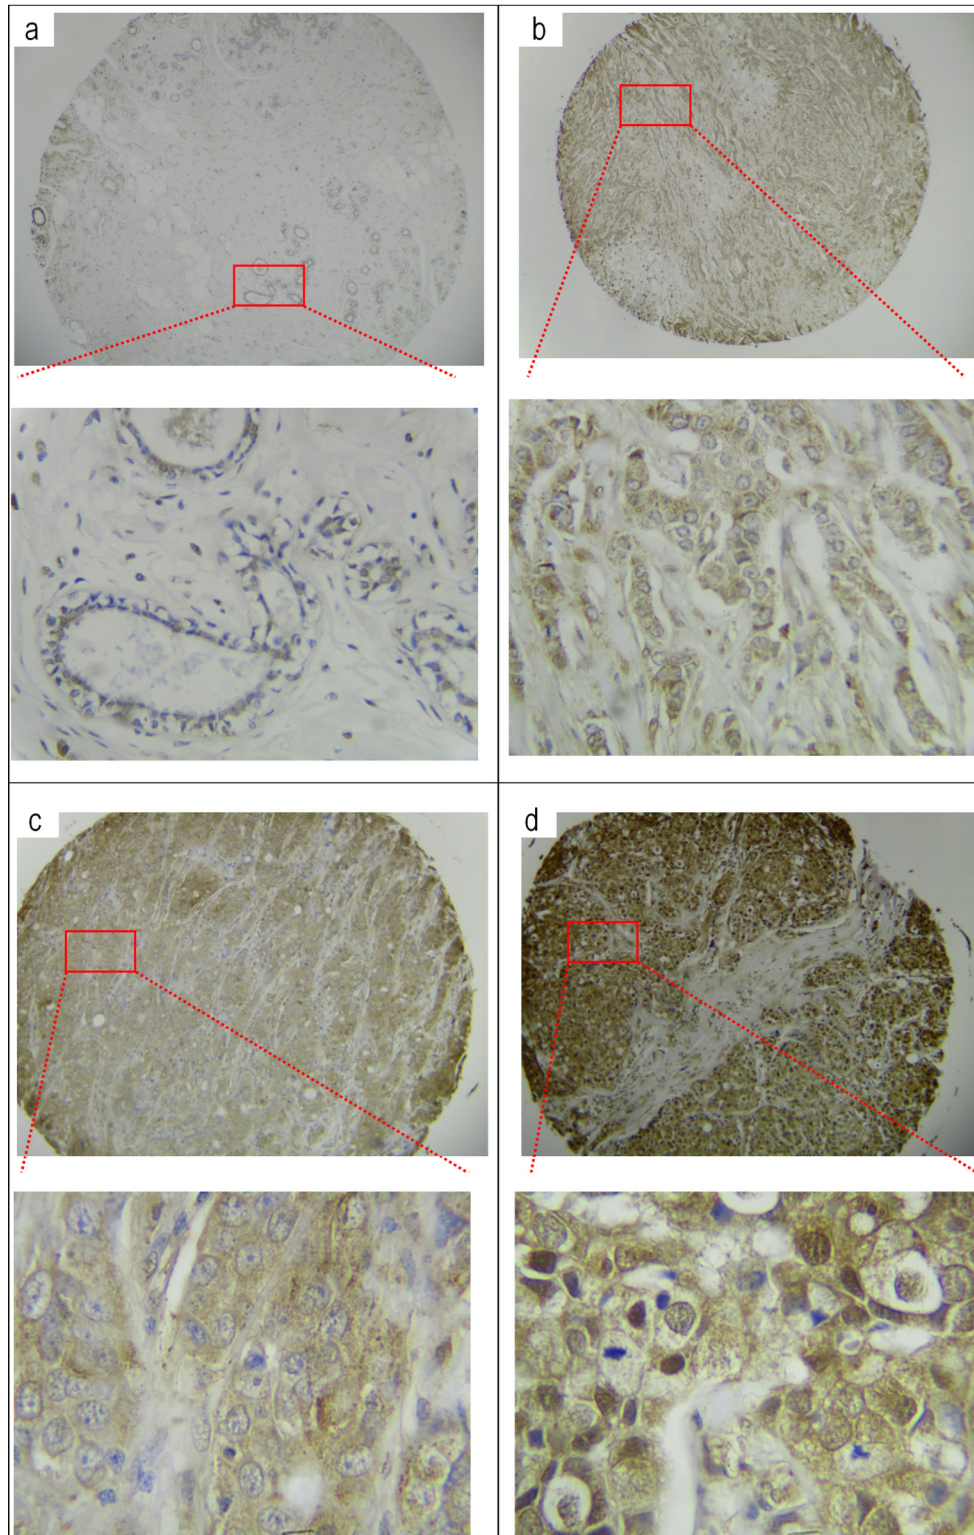

### Supplemental Figure S1

Representative photographs from DNAJA1 immunohistochemistry study performed with commercial tissue microarrays. 400X magnification of the selected regions (red rectangulars) were shown for each tissue spot. **(a)** Expression was lost in normal breast tissue. **(b, c, d)** Invasive Ductal Carcinoma tissues shows weak to strong cytoplasmic staining (brown).



**a.**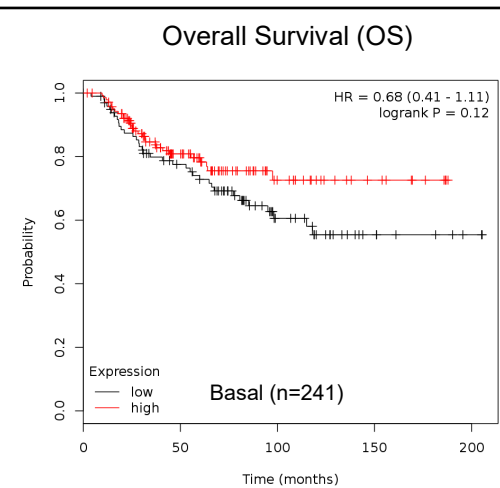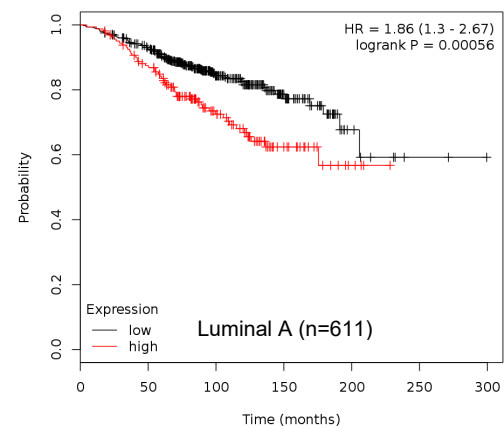**b.**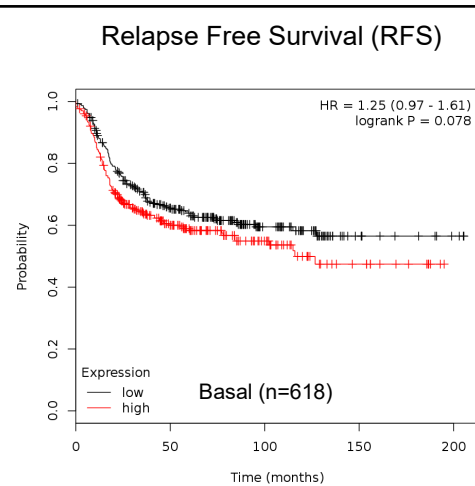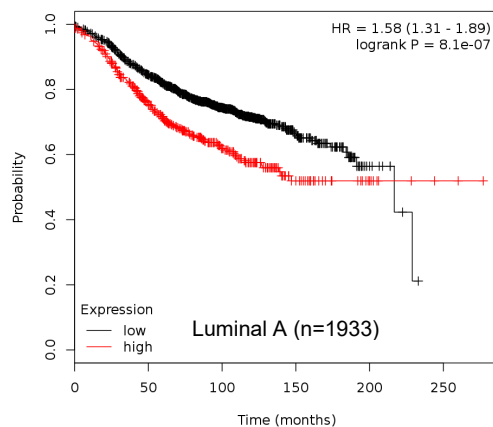**c.**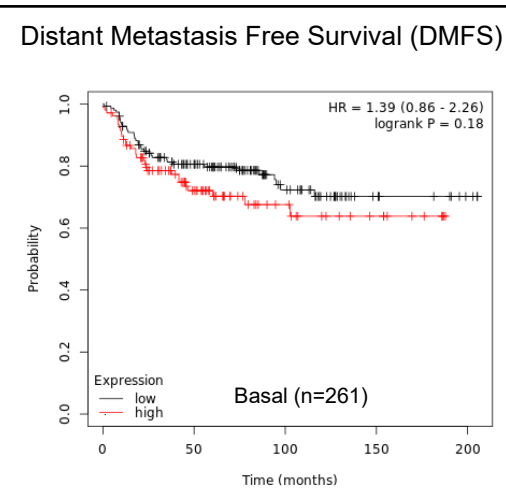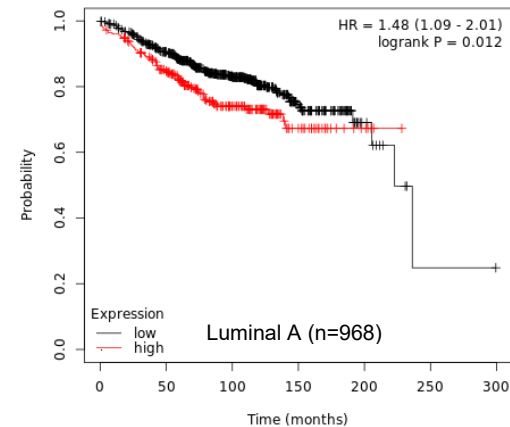

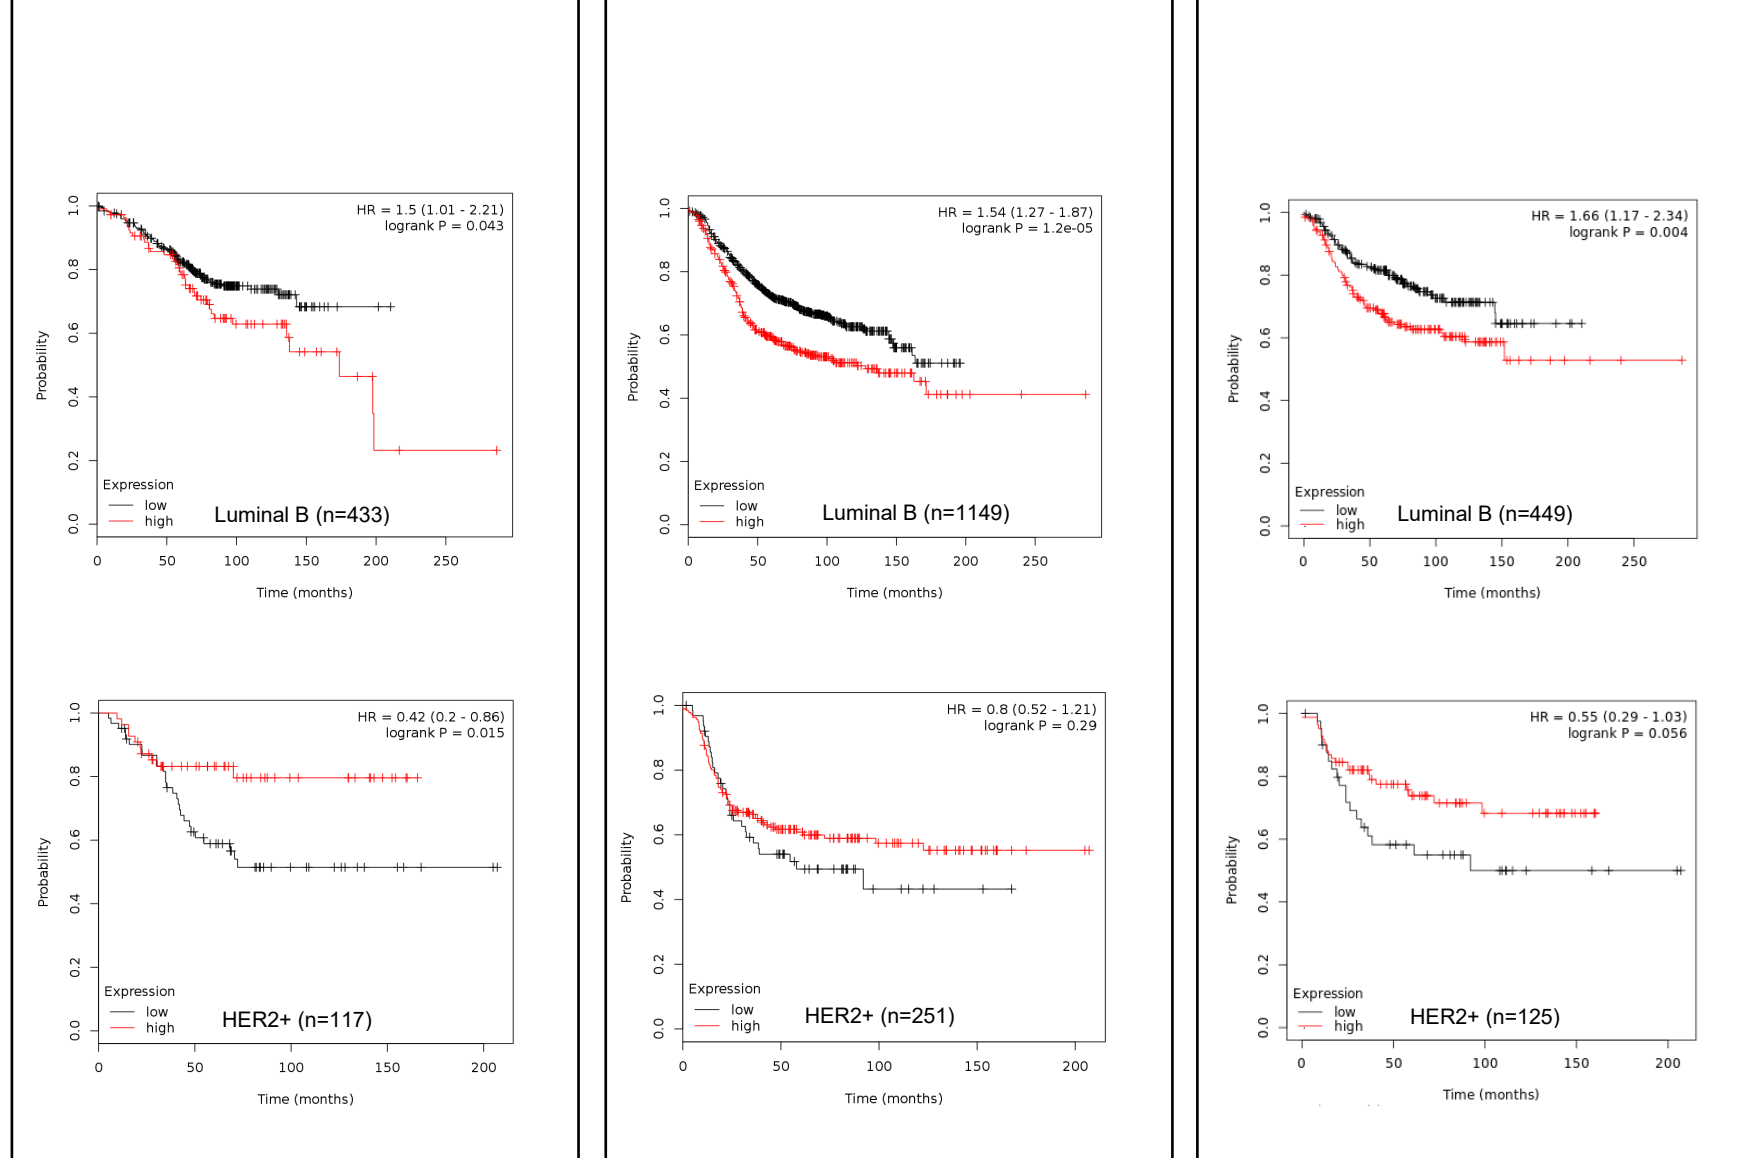

## Supplemental Figure S2

Kaplan-Meier plots of OS (a), RFS (b) and DMFS (c) in breast cancer subtypes according to *DNAAF1* mRNA expression. The probeset ID selected for *DNAAF1* expression was 200881\_at. **Reliability of the analysis:** Highly reliable analysis (>500 samples), neutral analysis (500-200 samples), preliminary analysis (200-50 samples) (Györfy et al. 2010).

a.

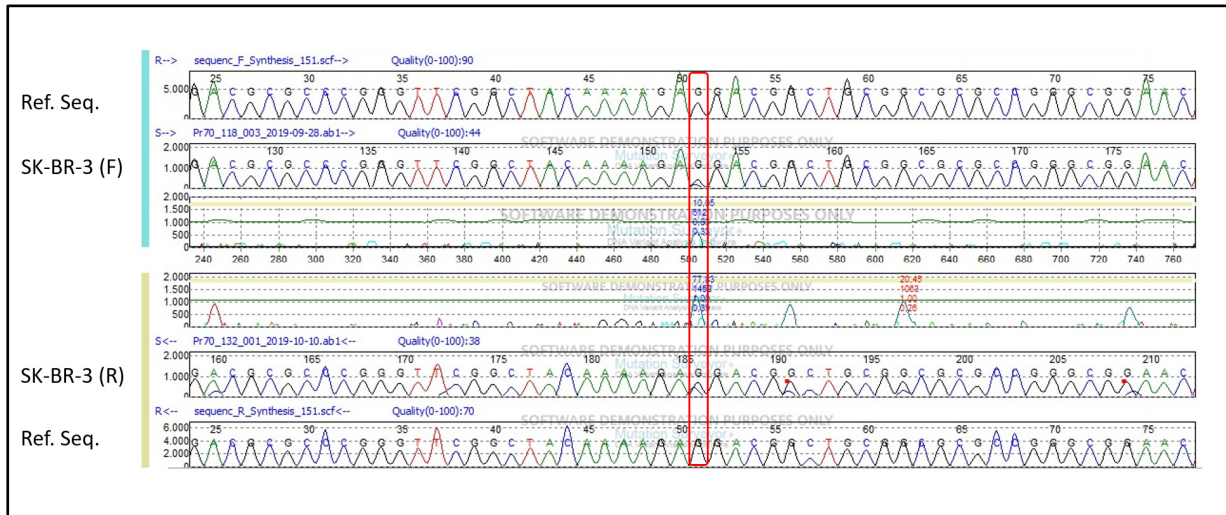

b.

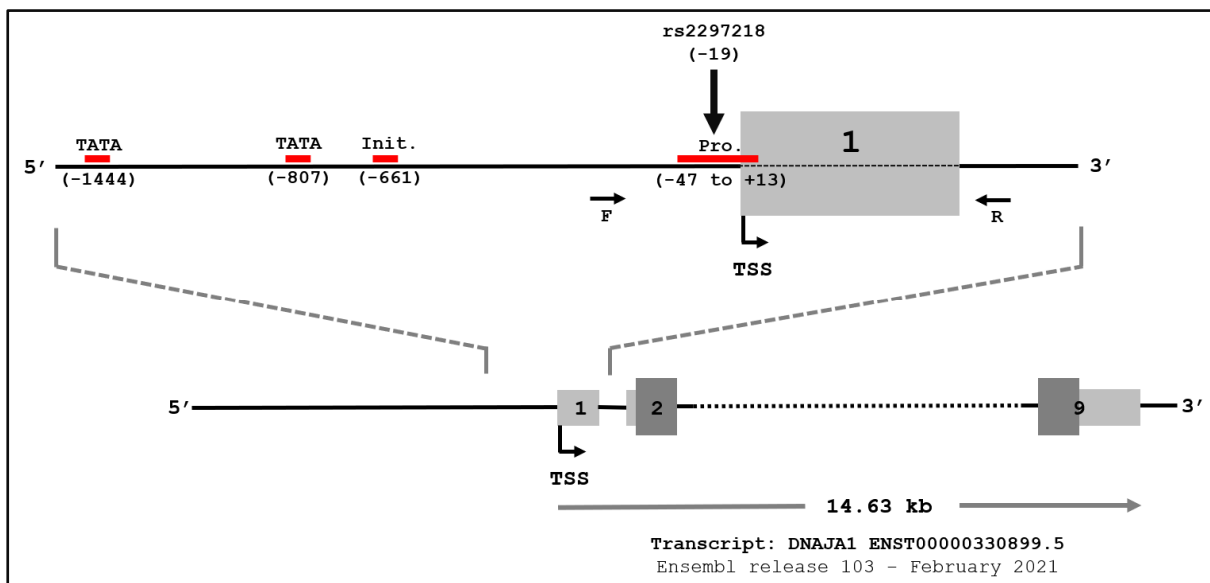

### Supplemental Figure S3

(a) Heterozygous SNP (rs2297218) in the promoter region of *DNAJA1* in SK-BR-3 cell line. “SK-BR-3 (F)”: Sequencing with forward primer; “SK-BR-3 (R)”: Sequencing with reverse primer; “Ref. Seq”: *DNAJA1* genomic sequence (NCBI Gene ID: 3301) (b) The position of the SNP relative to the promoter motifs and location of the primers are depicted. Promotor motifs are estimated by EPD “Search Motif Tool” from -2000 bp to 100 bp relative to TSS ( $P$  value = 0.001) (<https://epd.epfl.ch/index.php>). UTRs are presented as light gray boxes, translated exons are presented as dark gray boxes. TSS: Transcription start site; TATA: TATA-box; Init: Initiator; Pro: Core promoter sequences; F: Forward primer; R: Reverse primer.

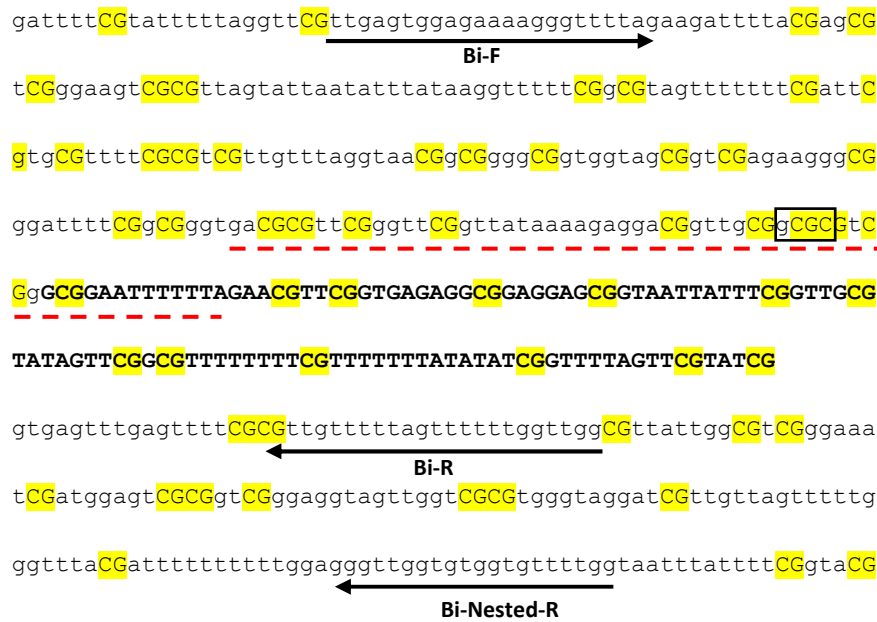

#### Supplemental Figure S4

Bisulfite-modified sequences of the *DNAA1* gene analysed by COBRA assay. All the CGs are suggested to be methylated and shown in yellow uppercase font. Arrows underlie the position of COBRA primers. Box shows the cutting site (GCG<sup>^</sup>C) of the *HhaI* restriction enzyme in Bi-F/Bi-R PCR amplicon (373 bp). The expected *HhaI* digestion fragments are 215 bp and 158 bp. Promotor region estimated by EPD (<https://epd.epfl.ch//index.php>) is shown as red dashed line. 1<sup>st</sup> UTR exon is depicted as bold uppercase font.

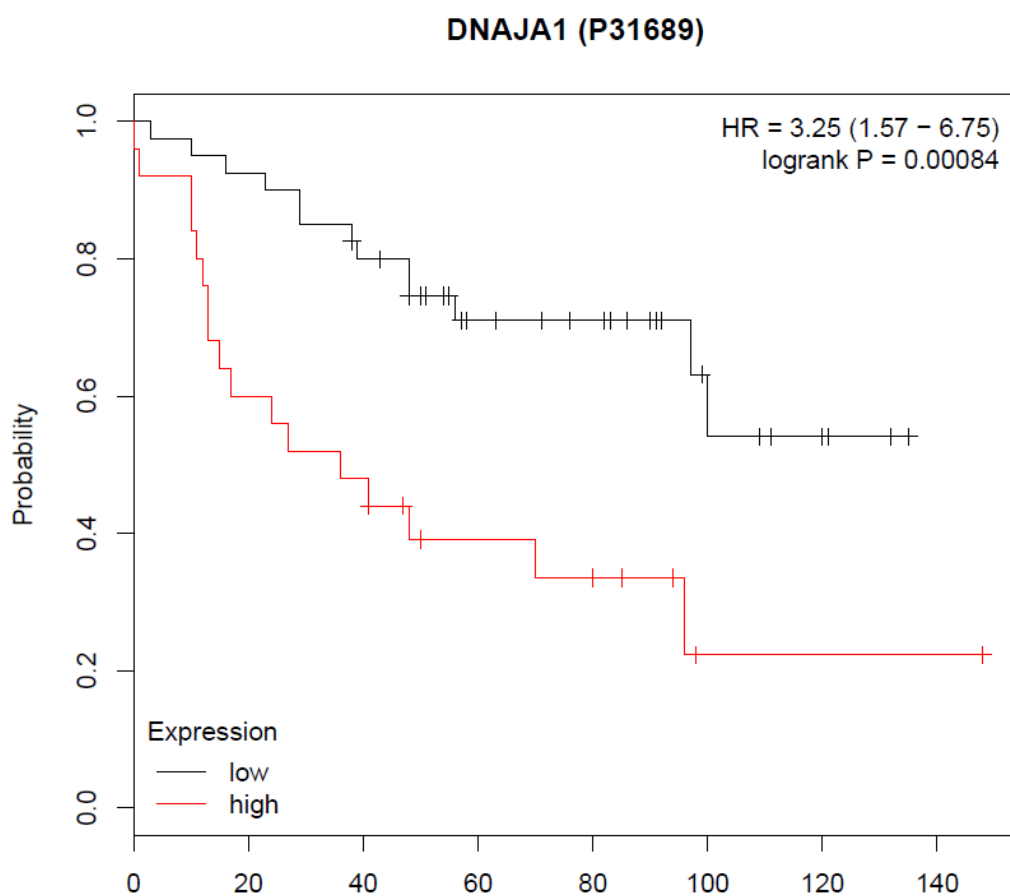

**Supplemental Figure S5**

Kaplan-Meier plot of *Overall Survival* in breast cancer according to DNAJA1 protein expression (n=65)  
(Uniprot ID: P31689) (Györfy et al., 2010; Tang et al., 2018)

## Supplemental Method Info.

### Immunohistochemistry (IHC) study

Novolink™ Min Polymer Detection System Kit was used according to the instructions (Cat. No: RE7290-K) (Novolink, Inc., CA, USA). Briefly, TMAs were baked at 60°C overnight to avoid tissue loss during staining procedures. The slides were deparaffinized by incubating them in xylene for 20 min., followed by rehydration in a graded series of ethanol. Sections were cooked in citrate buffer (10mM, pH 6.0) for antigen retrieval. Endogenous peroxidases were blocked with the solutions provided with the kit. TMAs were incubated overnight at 4°C with the primary antibody (rabbit polyclonal Anti-DNAJA1; Cat. No: 11713-1-AP) (Proteintech Group, Inc., IL, USA) (dilution 1:80). Slides were then incubated with Novolink™ Polymer for 30 minutes and peroxidase activity was developed with DAB working solution for 5 minutes. All slides were counterstained with hematoxylin. Anti-DNAJA1 antibody showed cytoplasmic dark brown staining with different degree of positivity. The tissue microarrays (TMAs) includes tissue spots of “Adrenal gland (Pheochromocytoma)” and they are positively stained with the anti-DNAJA1 antibody.

Immunopositivity of the cells was assessed by qualitative scoring system in which antigen expression are interpreted by two observers (TA, FCI) independently according to an arbitrary scoring range (0 to 3) (Lebok et al. 2019). Briefly, samples with complete absence of staining or staining intensity of 1+ in up to 30% of the cells were scored as negative (score 0); samples with a staining intensity of 1+ in more than 30% or 2+ in up to 30% of the cells were scored as weakly positive (score 1); samples with a staining intensity of 2+ in more than 30% or 3+ in up to 30% of the cells were scored as moderately positive (score 2); samples with a staining intensity was 3+ in more than 30% of the cells were scored as strongly positive (score 3). Statistical analyses were performed by GraphPad software by using *Fisher Exact Test* with a significance level of  $P < 0.05$ .
